MARCH 2015 | VOLUME 66 | NUMBER 3

# Psychiatric Services

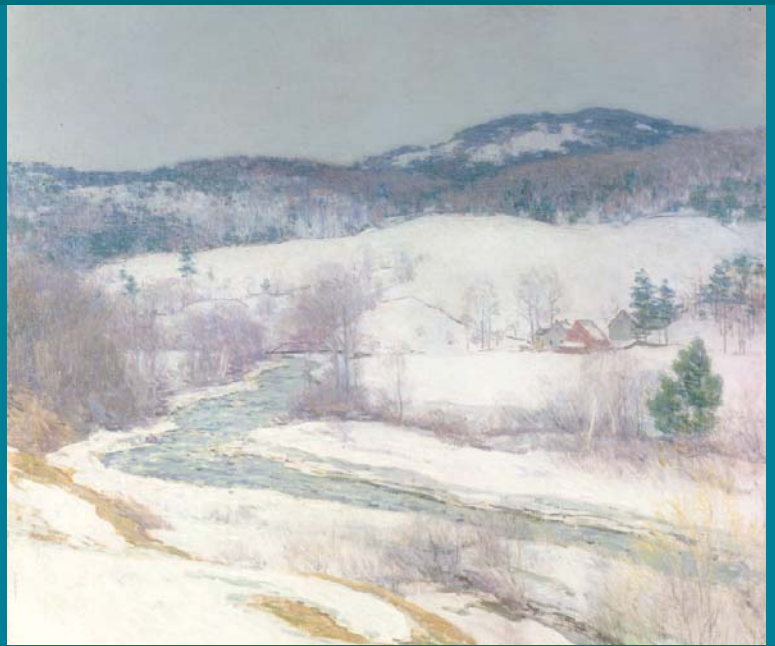

Using Feedback From Patient-Reported Outcome Measures: Best Practices  
Fewer Medication Side Effects for Depressed Patients in Collaborative Care  
Role of Race-Ethnicity and Gender in Treatment and Outcomes: Four Studies  
The ACA: An Opportunity for Improving Care for Substance Use Disorders?

A Journal of the American Psychiatric Association  
[ps.psychiatryonline.org](http://ps.psychiatryonline.org)
